# Supplementary material for: Efficient and chemoselective reduction of carbonyl compounds with supported gold catalysts under transfer hydrogenation conditions
Source: Royal Society of Chemistry journal article supplement (doi:10.1039/b807608a), 2008-01-01
Supplement: b807608a.pdf [file b807608a.pdf]

# Efficient and Chemoselective Reduction of Carbonyl Compounds with Supported Gold Catalysts under Transfer Hydrogenation Conditions

Fang-Zheng Su, Lin He, Ji Ni, Yong Cao,\* He-Yong He, and Kang-Nian Fan

*Department of chemistry & Shanghai key laboratory of molecular catalysis and innovative material, Fudan University, Shanghai 200433, P. R. China.*

## Electronic Supplementary Information

**1. Catalytic materials:** Gold catalysts including 1.5wt%Au/TiO<sub>2</sub> (Type A, Lot no. Au/TiO<sub>2</sub> #02-1), 4.5wt%Au/Fe<sub>2</sub>O<sub>3</sub> (Type C, Lot no. Au/Fe<sub>2</sub>O<sub>3</sub> #02-5) and 0.8wt%Au/C (Type D, Lot no. Au/C #38D), all supplied by the World Gold Council (WGC).

## 2. Catalytic Transfer hydrogenation of carbonyl compounds

**A typical procedure for transfer hydrogenation of ketones:** substrate (1 mmol), Au/TiO<sub>2</sub> catalyst (0.78 mol% metal), KOH (0.3 equiv) and 2-propanol (10 ml) were mixed and the solution was heated to reflux under N<sub>2</sub>. The products were analyzed by gas chromatography (Trace GC Ultra) fitted with a HP-5 capillary column (25 m × 0.32 mm) and flame ionization detector (FID), using o-xylene as the internal standard. The identification of the products was done in a GC-MS spectrometer comparing with commercially pure products.

**Recovery and reuse of Au/TiO<sub>2</sub>:** the catalyst was collected after filtration washed with acetone and heated at 120 °C for 12 h. Then the catalyst was used for next reaction.

**Transfer hydrogenation of aldehydes over Au/TiO<sub>2</sub>:** substrate (1 mmol), Au/TiO<sub>2</sub> (0.78 mol% metal), K<sub>2</sub>CO<sub>3</sub> (0.3 equiv) and 2-propanol (10 ml) were put into a stirred autoclave reactor (Dalian Tongchan Co. Ltd., Capacity: 50 ml) under N<sub>2</sub> atmosphere at 120 °C.

### 3. TEM images of Au catalysts.

#### 3.1 TEM image and size distribution of Au/TiO<sub>2</sub> before reaction.

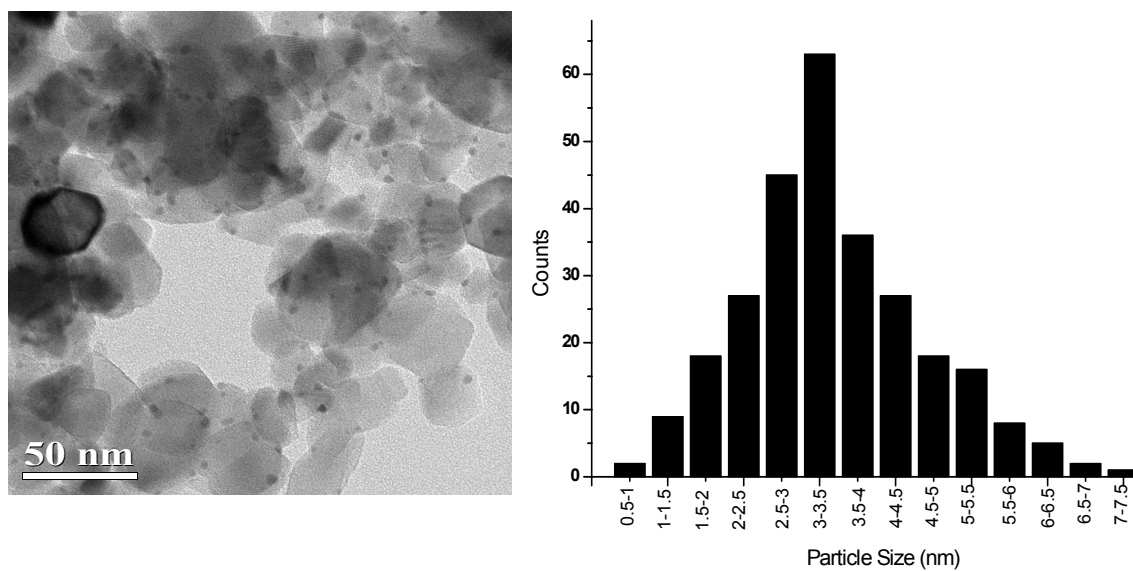

#### 3.2 TEM image and size distribution of Au/TiO<sub>2</sub> after reaction.

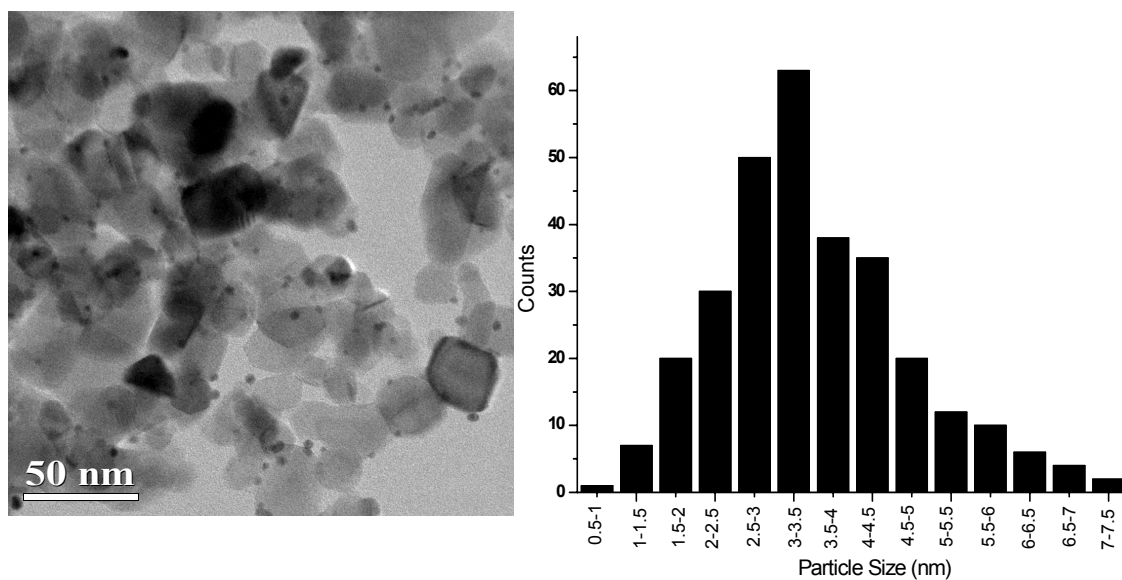

### 3.3 TEM images of Au/Fe<sub>2</sub>O<sub>3</sub> and Au/C

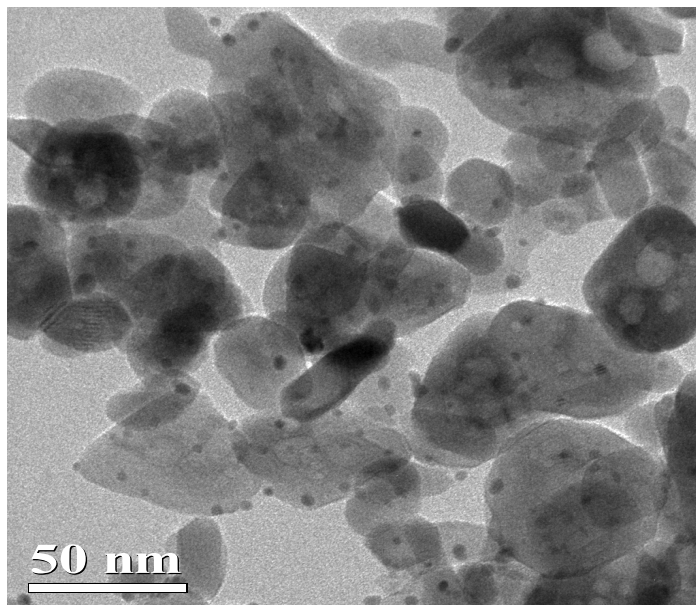

**Au/Fe<sub>2</sub>O<sub>3</sub>**

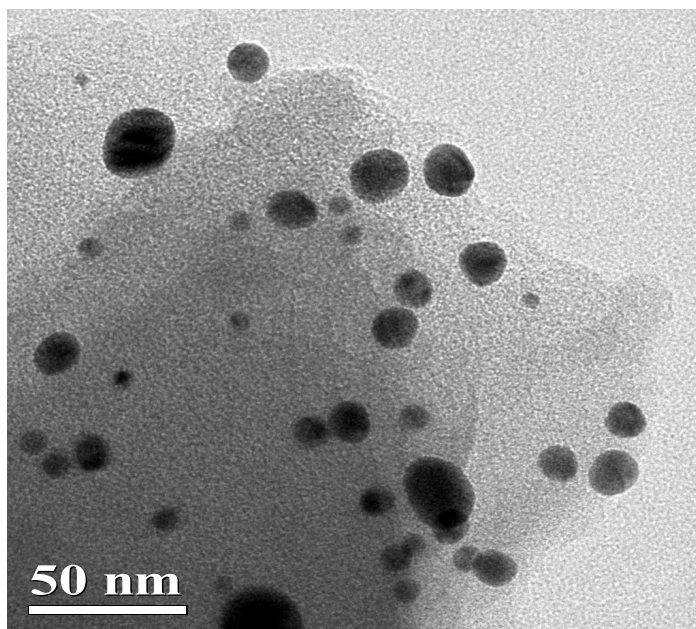

**Au/C**
